# Supplementary material for: Discovery of runs-of-homozygosity diplotype clusters and their associations with diseases in UK Biobank
Source: eLife journal article supplement (doi:10.7554/elife.81698), 2024-06-21
Supplement: supp [file elife-81698-supp-v1.zip]

Supplementary Materials for

Discovery of ROH diplotype clusters and their associations with  
diseases in UK Biobank

Ardalan Naseri<sup>1,+</sup>, Degui Zhi<sup>2,\*</sup>, and Shaojie Zhang<sup>1,\*</sup>

<sup>1</sup> Department of Computer Science, University of Central Florida, Orlando, Florida 32816, USA

<sup>2</sup> School of Biomedical Informatics, University of Texas Health Science Center at Houston,  
Houston, Texas 77030, USA

\* Correspondence: [degui.zhi@uth.tmc.edu](mailto:degui.zhi@uth.tmc.edu); [shzhang@cs.ucf.edu](mailto:shzhang@cs.ucf.edu)

<sup>+</sup> Present address: School of Biomedical Informatics, University of Texas Health Science Center at  
Houston, Houston, Texas 77030, USA

---

**Algorithm 1** Find all blocks of matches while maximizing the number of haplotypes

---

```
procedure MAXIMIZE_HAPLOTYPES( $x_k, t, a_k, d_k, L, c$ )  
   $V = []$ ,  $Q = []$   
  for  $r = 0$  to  $t$  do  
     $m.append([])$   
     $pq.append(k+1)$   
     $V.append([])$   
     $Q.append([])$   
  end for  
   $i_0 \leftarrow 0$   
  for  $i = 0$  to  $M - 1$  do  
    if  $d_k[i] > k - L + 1$  then  
       $changed \leftarrow false$   
      for  $p = 0$  to  $t$  do  
        for  $q = p + 1$  to  $t$  do  
          if  $len(m[p]) > 0$  and  $len(m[q]) > 0$  then  
             $changed \leftarrow true$   
            break  
          end if  
        end for  
      end for  
      if  $changed$  and  $i - i_0 \geq c$  then  
         $blockMatches = []$   
         $d_{min} \leftarrow 0$   
         $blockMatches.append[a_k[i_0]]$   
        for  $i_b = i_0 + 1$  to  $i$  do  
           $blockMatches.append([a_k[i_b]])$   
          if  $(d_k[i_b] > d_{min})$  then  
             $d_{min} = d_k[i_b]$   
          end if  
        end for  
        report  $d_{min}$  and  $blockMatches$   
      end if  
       $i_0 \leftarrow i$ ,  $m = []$   
      for  $r = 0$  to  $t$  do  
         $m.append([])$   
      end for  
    end if  
     $updateV\_Q(x_k[l], i, t, a_k, d_k, pq, V, Q)$   
  end for  
   $a_{k+1} \leftarrow concatenate[V_0, V_1, ..V_t]$   
   $d_{k+1} concatenate[Q_0, Q_1, ..Q_t]$   
end procedure
```

---

---

**Algorithm 2** Update intermediate variables for cPBWT

---

```
procedure UPDATE_V_Q(allele, i, t, ak, dk, pq, V, Q)  
  for p = 0 to t do  
    if dk[i] > pq[p] then  
      pq[p] ← dk[i]  
    end if  
  end for  
  V [allele].append(ak[i])  
  for p = 0 to t do  
    if allele == p then  
      Q[allele].append(pq[allele])  
      pq[allele] ← 0  
      mab[p].append(ak[i])  
    end if  
  end for  
end procedure
```

---

---

**Algorithm 3** Find all blocks of matches larger than  $L$  while maximizing the length of match

---

```
procedure MAXIMIZE_HAPLOTYPES( $x_k, t, a_k, d_k, L, c$ )
   $V = []$ ,  $Q = []$ 
  for  $r = 0$  to  $t$  do
     $m.append([])$ 
     $pq.append(k+1)$ 
     $V.append([])$ 
     $Q.append([])$ 
  end for
   $i_0 \leftarrow 0$ 
  for  $i = 0$  to  $M - 1$  do
    if  $d_k[i] > k - L + 1$  then
       $changed \leftarrow false$ 
      for  $p = 0$  to  $t$  do
        for  $q = p + 1$  to  $t$  do
          if  $len(m[p]) > 0$  and  $len(m[q] > 0)$  then
             $changed \leftarrow true$ 
            break
          end if
        end for
      end for
    end for
    if  $changed$  and  $i - i_0 \geq c$  then
       $blockMatches = []$ ,  $d_{min} \leftarrow 0$ ,  $f_a \leftarrow a_k[i_0]$ ,  $f_b \leftarrow d_k[i_0 + 1]$ 
       $T_d[V_a].append(f_a)$ ,  $all_a.append(f_a)$ 
      for  $i_a = i_0 + 1$  to  $i$  do
         $blockMatches.append([a_k[i_a]])$ 
        if  $(d[i_a] > d_{min})$  then
           $d_{min} = d_k[i_a]$ 
        end if
         $f_a \leftarrow x_k[a_k[i_a]]$ ,  $T_d[V_a].append(d_{min})$ ,  $all_a.append(d_{min})$ 
      end for
      for  $r = 0$  to  $t$  do
        if  $len[T_d[r]] \geq c$  and  $quick\_select(T_d[r], c - 1) \leq quick\_select(all_a, c - 1)$  then
          skip

           $i_b \leftarrow i_0$ 
          if  $f_b \leq quick\_select(all_a, c - 1)$  then
             $blockMatches.append([a_k[i_0]])$ 
            for  $i_a = i_0 + 1$  to  $i$  do
              if  $d_k[i_a] \leq quick\_select(all_a, c - 1)$  then
                 $blockMatches.append(a_k[i])$ 
              end if
            end for
             $d_r = quick\_select(all_a, c - 1)$ 
            report  $blockMatches$  and  $d_r$ 
          end if
        end for
         $i_0 \leftarrow i$ ,  $m = []$ 
        for  $r = 0$  to  $t$  do
           $m.append([])$ 
        end for
      end if
      update  $V, Q(x_k[i], i, t, a_k, d_k, pq, V, Q)$ 
    end for
     $a_{k+1} \leftarrow concatenate[V_0, V_1, \dots, V_t]$ 
     $d_{k+1} \leftarrow concatenate[Q_0, Q_1, \dots, Q_t]$ 
```

---
