# Supplementary material for: Discovery of runs-of-homozygosity diplotype clusters and their associations with diseases in UK Biobank
Source: eLife. 2024 Jun 21;13:e81698. doi: 10.7554/eLife.81698 (PMC11249732; doi:10.7554/eLife.81698)
Supplement: Supplementary file 4. [file elife-81698-supp4.xlsx]

## Sheet: Sheet1
Supplementary Table S1: Clusters of 100 ROH diplotypes with the lowest p-values
PHESANT					GWAS				Chi-square						GWAS*
Location	genetic length (cM)	Non-cancerous disease	p-value (PHESANT)	beta (PHESANT)	Location (GWAS)	GWAS p-value	SNP (GWAS)	beta (GWAS)	Non-cancerous disease (X2)	p-value (X2)	D1	D2	N1	N2	Location (GWAS)	p-value(GWAS)	SNP(GWAS)	beta (GWAS*)	D'
chr1:151515188-151902494	0.369009	eczema/dermatitis	1.51752e-27	0.0440839	151763334	3.44795e-36	rs55875222	0.0142512	eczema/dermatitis	7.57055e-35	35	163	12259	418243	151763334	3.44795e-36	rs55875222	0.0142512	1
chr1:151940401-152280032	0.12402	eczema/dermatitis	9.46419e-24	0.0528574	152271219	1.35165e-64	rs61815559	0.0183911	asthma	2.08469e-14	137	497	50501	379565	152179152	4.64573e-29	rs12123821	0.0203649	1
chr1:152493154-152964479	0.359474	eczema/dermatitis	1.52758e-21	0.0386936	152536650	1.00841e-42	rs61813875	0.0161521	eczema/dermatitis	3.57966e-27	27	125	12267	418281	152536650	1.00841e-42	rs61813875	0.0161521	1
chr1:169075589-169528830	0.560755	deep venous thrombosis (dvt)	3.09517e-21	0.0386453	169519049	7.41334e-166	rs6025	-0.0312595	deep venous thrombosis (dvt)	1.08166e-30	20	90	8918	421672	169519049	7.41334e-166	rs6025	-0.0312595	1
chr10:5735817-6010864	0.365305	anxiety/panic attacks	8.50435e-09	0.0309857	5755832	8.36231e-05	rs12570524	0.00132255	anxiety/panic attacks	3.1895e-11	11	102	6702	423885	5755832	8.36231e-05	rs12570524	0.00132255	1
chr10:70390901-70808484	0.169919	trapped nerve/compressed nerve	9.0773e-12	0.08064	70539283	4.27635e-05	rs190940868	0.00156238	trapped nerve/compressed nerve	6.50083e-12	15	863	1397	428425	70539283	4.27635e-05	rs190940868	0.00156238	1
chr10:8148842-8420018	0.622977	anxiety/panic attacks	5.51157e-09	0.0316251	8212576	0.00117701	rs140604067	0.0108502	anxiety/panic attacks	5.5226e-11	11	104	6702	423883	8212576	0.00117701	rs140604067	0.0108502	1
chr11:34791897-35181992	0.281825	irritable bowel syndrome	2.58824e-10	0.029434	35109765	0.00607716	rs190608148	0.00921655	irritable bowel syndrome	5.41998e-11	15	105	11116	419464	35109765	0.00607716	rs190608148	0.00921655	0.0037
chr11:8335439-8710244	0.427168	atrial fibrillation	2.42088e-09	0.0450129	8397355	0.00042941	rs4758065	-0.00529702	atrial fibrillation	3.23805e-11	13	259	3721	426707	8397355	0.00042941	rs4758065	-0.00529702	1
chr12:111910219-112874179	0.0433836	hypothyroidism/myxoedema	4.50671e-21	0.0616858	111932800	1.87657e-80	rs7137828	-0.00986569	hypothyroidism/myxoedema	7.48518e-22	1898	28609	19887	380306	111932800	1.87657e-80	rs7137828	-0.00986569	0.9994
chr12:41382328-42027870	0.316744	cholelithiasis/gall stones	6.76593e-16	0.0365978	41799446	1.6188e-05	rs190960514	0.0169385	cholelithiasis/gall stones	7.25429e-19	14	88	7492	423106	41799446	1.6188e-05	rs190960514	0.0169385	1
chr12:76520207-77060731	0.568915	hyperthyroidism/thyrotoxicosis	1.32323e-10	0.0419474	76604670	0.00332155	rs7295534	-0.000647956	hyperthyroidism/thyrotoxicosis	1.54385e-12	10	159	3411	427120	76604670	0.00332155	rs7295534	-0.000647956	0.9636
chr13:103385064-103580421	0.237641	kidney stone/ureter stone/bladder stone	6.75832e-10	0.042924	103578435	0.00130167	rs9514072	-0.000776782	kidney stone/ureter stone/bladder stone	5.64155e-11	11	204	3564	426921	103578435	0.00130167	rs9514072	-0.000776782	0.9269
chr13:36502690-37025341	0.301722	pleurisy	4.08379e-07	0.0550683	36946731	1.10706e-05	rs574102140	0.00951687	pleurisy	2.33846e-13	11	386	1629	428674	36946731	1.10706e-05	rs574102140	0.00951687	1
chr13:39396590-39787406	0.345034	heart valve problem/heart murmur	2.51049e-09	0.0430453	39706277	0.00192991	rs55958151	-0.00292653	heart valve problem/heart murmur	7.74277e-11	10	203	3058	427429	39706277	0.00192991	rs55958151	-0.00292653	1
chr15:76395670-77197745	0.140306	bladder problem (not cancer)	5.4455e-12	0.044128	76435343	2.67294e-05	rs2955727	-0.000855124	bladder problem (not cancer)	5.01257e-17	10	153	2705	427832	76435343	2.67294e-05	rs2955727	-0.000855124	1
chr16:12156507-12486383	0.257199	chronic fatigue syndrome	1.39954e-09	0.0536312	12240302	0.003612	rs192134719	0.00291286	chronic fatigue syndrome	9.14323e-14	11	313	1949	428427	12240302	0.003612	rs192134719	0.00291286	1
chr17:78925649-79174221	0.592541	duodenal ulcer	1.6724e-07	0.0570418	78975689	0.00414717	rs138103409	0.00428433	duodenal ulcer	4.67476e-11	12	484	1782	428422	78975689	0.00414717	rs138103409	0.00428433	1
chr18:45028460-45484821	0.510704	emphysema/chronic bronchitis	3.5427e-10	0.0331798	45302624	0.00133413	rs559392789	0.0110369	emphysema/chronic bronchitis	3.75419e-11	10	95	6097	424498	45302624	0.00133413	rs559392789	0.0110369	1
chr18:77574977-77933024	0	emphysema/chronic bronchitis	5.95833e-09	0.0321701	77790402	0.000517911	rs57915366	-0.00139221	emphysema/chronic bronchitis	1.05995e-10	11	118	6096	424475	77790402	0.000517911	rs57915366	-0.00139221	1
chr19:19334580-19765499	0.10789	high cholesterol	6.45504e-12	-0.0420595	19379549	2.40231e-22	rs58542926	-0.0146353	high cholesterol	3.68086e-12	112	1463	55989	373136	19379549	2.40231e-22	rs58542926	-0.0146353	1
chr19:42306326-42894481	0.21057	spinal cord disorder	9.91937e-08	0.10835	42605015	4.56091e-05	rs140561427	0.00164525	spinal cord disorder	1.13047e-10	10	1555	412	428723	42605015	4.56091e-05	rs140561427	0.00164525	1
chr2:148272869-148915940	0.262328	back problem	3.06862e-11	0.0410652	148704456	0.000274653	rs535679498	0.0129585	back problem	5.04021e-12	26	373	7722	422579	148704456	0.000274653	rs535679498	0.0129585	0.0437
chr2:152677308-153354994	0.267358	tonsiltis	8.28572e-10	0.0495831	153300413	0.001847	rs150895719	0.00528849	tonsiltis	1.20972e-12	15	335	3377	426973	153300413	0.001847	rs150895719	0.00528849	1
chr2:206822425-207365028	0.24501	bronchitis	1.3782e-10	0.044582	207278803	0.000753238	rs148213501	0.00361981	bronchitis	6.02598e-11	11	205	3555	426929	207278803	0.000753238	rs148213501	0.00361981	1
chr2:242116367-242463904	0.0777791	glaucoma	1.72478e-10	0.0372534	242443588	0.00109592	rs562475096	0.00664356	glaucoma	3.6644e-11	10	121	4871	425698	242443588	0.00109592	rs562475096	0.00664356	0.0633
chr2:38902624-39377823	0.159119	essential thrombocytosis	1.08817e-09	0.107953	-	-	-	rs58542926	chickenpox	1.50548e-10	12	243	3620	426825	39103582	0.00192516	rs75649204	0.00142052	-
chr2:72313631-73155980	0.326258	myeloproliferative disorder	4.38543e-11	0.0739303	-	-	-	rs57915366	osteoporosis	3.84585e-12	12	101	7354	423233	72354740	0.00357372	rs116547657	-0.00241257	-
chr2:96017141-96963715	0.0960586	spine arthritis/spondylitis	3.75377e-09	0.0380512	96412149	0.000132793	rs147291072	0.00542027	spine arthritis/spondylitis	1.05736e-10	10	157	3950	426583	96412149	0.000132793	rs147291072	0.00542027	1
chr20:18043285-18433335	0.537108	helicobacter pylori	2.06933e-07	0.0647413	18104195	9.52577e-07	rs190916947	0.0108481	helicobacter pylori	1.69231e-11	11	578	1241	428870	18104195	9.52577e-07	rs190916947	0.0108481	1
chr20:25264772-25920544	0.0274935	fracture hand	1.91385e-09	0.146224	25368540	1.0255e-05	rs146702357	0.000579569	fracture hand	1.12325e-11	10	1954	302	428434	25368540	1.0255e-05	rs146702357	0.000579569	0.4026
chr21:44145135-44424444	0.341499	multiple sclerosis	2.98385e-10	0.0835949	44190435	0.00445967	rs7283513	0.000430966	multiple sclerosis	7.43926e-11	23	1675	1566	427436	44190435	0.00445967	rs7283513	0.000430966	0.9925
chr4:105810813-106318456	0.185836	thyroid problem (not cancer)	1.94406e-10	0.0746398	105824342	0.000799793	rs561067487	0.00643969	thyroid problem (not cancer)	7.6508e-12	11	618	1133	428938	105824342	0.000799793	rs561067487	0.00643969	1
chr4:187588477-187830504	0.620604	arthritis (nos)	3.32384e-09	0.0387506	187619690	0.00131613	rs114699568	-0.00366458	cataract	3.42085e-09	13	141	7718	422828	187783809	1.56256e-06	rs140453797	0.00774835	1
chr4:320771-691067	0.0136779	diverticular disease/diverticulitis	1.38446e-11	0.0406196	641404	0.00713331	rs530205752	0.0104194	diverticular disease/diverticulitis	5.93148e-13	14	183	5242	425261	641404	0.00713331	rs530205752	0.0104194	1
chr4:3263226-3503368	0.254227	cataract	1.41585e-10	0.0321985	3486002	0.000438078	rs114094073	0.00279826	cataract	7.45152e-11	11	90	7720	422879	3486002	0.000438078	rs114094073	0.00279826	1
chr5:131824486-132311584	0.395537	encephalitis	5.45945e-09	0.13901	132035506	0.000382633	rs190000841	0.00129417	encephalitis	1.18288e-12	10	2118	259	428313	132035506	0.000382633	rs190000841	0.00129417	1
chr6:25414023-25812069	0.19432	malabsorption/coeliac disease	1.09953e-13	0.0954403	25714959	1.52283e-93	rs34493019	0.00551201	malabsorption/coeliac disease	5.63397e-14	37	2514	1876	426273	25714959	1.52283e-93	rs34493019	0.00551201	1
chr6:25969631-26108168	0.0115974	haemochromatosis	8.02061e-120	0.417353	-	-	-	-	hereditary/genetic haematological disorder	6.24549e-248	52	2384	331	427933	26093141	6.15936e-51	rs1800562	0.00200143	-
chr6:25981648-26117220	0.00791855	haemochromatosis	1.01668e-119	0.417761	-	-	-	rs561067487	osteoarthritis	9.23159e-15	331	2112	38623	389634	26032847	0.000157406	rs6456708	0.00255986	-
chr6:25988167-26122453	0.00774912	haemochromatosis	9.15736e-120	0.417491	-	-	-	-	haemochromatosis	0	56	2383	43	428218	-	-	-	-	-
chr6:26031868-26149000	0.0936275	haemochromatosis	1.56021e-118	0.40381	-	-	-	rs34493019	unclassifiable	7.58221e-19	192	2152	18833	409523	26038969	0.00228183	rs78691847	0.0215778	-
chr6:26380478-26467182	0.018238	malabsorption/coeliac disease	6.31992e-48	0.164323	26441640	7.39929e-144	rs13220495	0.00650849	malabsorption/coeliac disease	2.10241e-60	97	4709	1816	424078	26441640	7.39929e-144	rs13220495	0.00650849	0.9848
chr6:26700560-27201262	0.0305467	haemochromatosis	8.99576e-43	0.412641	-	-	-	rs13220495	hereditary/genetic haematological disorder	4.0179e-33	34	6182	349	424135	27037080	1.92673e-20	rs13194491	0.00114825	-
chr6:26700560-27201262	0.0305467	haemochromatosis	8.99576e-43	0.412641	-	-	-	-	hereditary/genetic haematological disorder	4.0179e-33	34	6182	349	424135	27037080	1.92673e-20	rs13194491	0.00114825	-
chr6:27036482-27277665	0.0433042	malabsorption/coeliac disease	2.75702e-49	0.166916	27274834	5.04596e-153	rs56114371	0.00667296	malabsorption/coeliac disease	1.68321e-60	99	4867	1814	423920	27274834	5.04596e-153	rs56114371	0.00667296	0.9972
chr6:28085173-28177588	0.0129757	malabsorption/coeliac disease	4.17173e-55	0.176861	28174757	3.52414e-171	rs13197633	0.00694699	malabsorption/coeliac disease	2.27299e-67	110	5398	1803	423389	28174757	3.52414e-171	rs13197633	0.00694699	1
chr6:28349926-28483150	0.00130703	haemochromatosis	1.24797e-29	0.302164	-	-	-	rs13220495	hereditary/genetic haematological disorder	1.80674e-18	19	3477	364	426840	28383898	1.51742e-11	rs34409925	0.000840066	-
chr6:28371346-28508449	0.0105851	haemochromatosis	8.95724e-30	0.301439	-	-	-	rs13197633	haemochromatosis	1.93355e-98	20	3441	79	427160	-	-	-	-	-
chr6:28510978-28724852	0.0316327	ankylosing spondylitis	1.06435e-11	0.0768384	28569177	2.46798e-28	rs114365536	0.00921178	ankylosing spondylitis	1.57416e-13	13	681	1243	428763	28569177	2.46798e-28	rs114365536	0.00921178	1
chr6:28956751-29086829	0.00623643	malabsorption/coeliac disease	9.49771e-55	0.177628	29001515	5.08293e-189	rs3129799	0.00718028	malabsorption/coeliac disease	7.17638e-65	110	5536	1803	423251	29001515	5.08293e-189	rs3129799	0.00718028	1
chr6:29081161-29257967	0.00823531	malabsorption/coeliac disease	1.56709e-55	0.179755	29244219	1.17509e-190	rs144447022	0.00720722	haemochromatosis	2.531e-38	26	13433	73	417168	-	-	-	-	1
chr6:29356331-29408554	0.00154732	psoriasis	2.36612e-13	0.0810655	29406542	1.32515e-72	rs55969931	0.0110421	psoriasis	2.127e-12	183	8925	5020	416572	29406542	1.32515e-72	rs55969931	0.0110421	0.4567
chr6:29589666-29664452	0.0535644	malabsorption/coeliac disease	1.22512e-75	0.207683	29660816	1.29721e-217	rs3116813	0.00775664	malabsorption/coeliac disease	6.81028e-90	145	7058	1768	421729	29660816	1.29721e-217	rs3116813	0.00775664	0.4547
chr6:30025984-30079307	0.0580608	malabsorption/coeliac disease	2.24294e-88	0.215045	30063652	3.73334e-237	rs1264706	0.007715	haemochromatosis	1.63768e-49	14	3244	85	427357	-	-	-	-	1
chr6:30036083-30093137	0.0584948	psoriasis	1.02641e-21	0.076504	30089257	9.80677e-142	rs28780085	0.0131308	psoriasis	7.8166e-23	64	1586	5139	423911	30089257	9.80677e-142	rs28780085	0.0131308	0.9993
chr6:30384317-30515193	0.0274376	malabsorption/coeliac disease	7.34491e-105	0.2385	30495860	7.59231e-248	rs3094024	0.00756983	malabsorption/coeliac disease	1.05376e-130	185	8245	1728	420542	30495860	7.59231e-248	rs3094024	0.00756983	0.9963
chr6:30647005-30690635	0.00800453	malabsorption/coeliac disease	5.53516e-105	0.243362	30687614	2.17872e-253	rs3132585	0.007598	hepatitis c	1.08408e-11	11	7892	82	422715	30666059	6.35204e-05	rs9262148	0.000194684	0.9991
chr6:30671726-30711026	0.00726847	psoriasis	4.72087e-59	0.149236	30706631	1.06564e-193	rs41315800	0.0161825	psoriasis	7.64766e-65	303	9607	4900	415890	30706631	1.06564e-193	rs41315800	0.0161825	0.922
chr6:30672433-30711357	0.00726867	malabsorption/coeliac disease	5.4231e-107	0.245661	30708955	1.33335e-253	rs1059612	0.00763206	sarcoidosis	2.04847e-07	143	102819	731	327007	30699022	4.91004e-15	rs3095327	0.00114465	0.9972
chr6:30764081-30805921	0.115441	malabsorption/coeliac disease	4.56379e-119	0.248965	30803526	3.69770e-310	rs1110482	0.00835177	ankylosing spondylitis	6.98344e-20	16	721	1240	428723	30771612	4.64206e-19	rs1264368	0.00134083	1
chr6:30935290-30983683	0.00362591	psoriasis	5.90198e-51	0.135279	30959001	0	rs13211972	0.0238283	rheumatoid arthritis	2.25363e-13	10	99	5023	425568	30939237	2.59358e-16	rs34847854	0.00412791	1
chr6:31017334-31060162	0.00497447	malabsorption/coeliac disease	6.96646e-162	0.282513	31018908	0	rs3131920	0.00896796	malabsorption/coeliac disease	3.1598e-210	245	9528	1668	419259	31018908	0	rs3131920	0.00896796	0.9991
chr6:31125823-31170947	0.00316283	malabsorption/coeliac disease	7.60709e-169	0.288018	31129310	0	rs7750641	0.00917716	multiple sclerosis	4.12242e-11	77	9934	1512	419177	31141970	6.79537e-18	rs3094189	-0.00178832	1
chr6:31251937-31261276	5.18863e-05	psoriasis	1.04822e-104	0.210165	31255008	0	rs13214872	0.0193361	psoriatic arthropathy	1.48494e-19	100	21177	755	408668	31255008	5.97755e-46	rs13214872	0.002357	1
chr6:31254263-31263216	3.07226e-05	psoriasis	1.20339e-122	0.214294	31255008	0	rs13214872	0.0193361	psoriasis	1.36034e-134	554	16605	4649	408892	31255008	0	rs13214872	0.0193361	1
chr6:31262169-31298240	0.00825892	malabsorption/coeliac disease	5.99518e-139	0.318035	31288877	0	rs7748141	0.00993928	hyperthyroidism/thyrotoxicosis	1.40293e-25	276	18681	3145	408598	31288877	5.80029e-82	rs7748141	0.00576558	1
chr6:31367882-31407331	0.00364839	malabsorption/coeliac disease	2.68851e-81	0.28926	31386131	0	rs3132472	0.0101298	hypothyroidism/myxoedema	3.72823e-20	1805	27307	19980	381608	31382717	5.09976e-48	rs2853975	0.00824739	1
chr6:31379990-31413000	0.00144614	malabsorption/coeliac disease	2.47634e-72	0.281812	31408329	0	rs3132473	0.0101542	adrenocortical insufficiency/addison's disease	2.85337e-12	36	31771	128	398765	31410521	1.00425e-14	rs3093958	0.000550131	0.6196
chr6:31431031-31464050	0.0711982	ankylosing spondylitis	4.62308e-34	0.121055	31433751	0	rs113340460	0.0145485	ankylosing spondylitis	2.1413e-46	32	1264	1224	428180	31433751	0	rs113340460	0.0145485	0.6103
chr6:31555392-31605199	0.12544	malabsorption/coeliac disease	9.29418e-196	0.275	31587083	0	rs3130621	0.00801961	type 1 diabetes	1.75411e-13	26	7108	376	423190	31602967	2.37723e-17	rs1046089	0.000626453	1
chr6:31560910-31613739	0.124555	malabsorption/coeliac disease	3.54737e-196	0.275611	31587083	0	rs3130621	0.00801961	malabsorption/coeliac disease	8.70053e-277	231	6948	1682	421839	31587083	0	rs3130621	0.00801961	1
chr6:31710968-31794592	0.0068075	polymyalgia rheumatica	7.31131e-09	0.0803822	31771916	1.59321e-08	rs1150748	0.000680167	polymyalgia rheumatica	4.10875e-11	12	871	991	428826	31771916	1.59321e-08	rs1150748	0.000680167	1
chr6:31739120-31836994	0.016794	psoriasis	1.06696e-27	0.070756	31816059	0	rs28732162	0.0250987	multiple sclerosis	8.17812e-27	94	8804	1495	420307	31812038	6.73921e-49	rs9267576	-0.003041	1
chr6:31788015-31864547	0.0223232	rheumatoid arthritis	6.17818e-19	0.107872	31811563	2.36295e-22	rs3130479	0.00401256	rheumatoid arthritis	1.00217e-19	506	28914	4527	396753	31811563	2.36295e-22	rs3130479	0.00401256	0.181
chr6:31841450-31927342	0.0233201	psoriasis	2.74063e-27	0.0700073	31861207	0	rs28732164	0.0250686	psoriasis	3.68642e-34	45	678	5158	424819	31861207	0	rs28732164	0.0250686	1
chr6:31925848-32044315	0.0164179	multiple sclerosis	1.27173e-21	0.163078	32026257	4.54742e-57	rs3130285	-0.00330725	ulcerative colitis	2.27836e-11	141	14555	2244	413760	32022147	5.23717e-12	rs150622545	0.00264863	1
chr6:32031311-32119898	0.0317543	malabsorption/coeliac disease	1.28252e-195	0.274152	32050758	0	rs1150754	0.0087333	hypothyroidism/myxoedema	6.01408e-13	317	8927	21468	399988	32055486	6.1634e-44	rs137893789	0.0153113	1
chr6:32114445-32176782	0.0311868	malabsorption/coeliac disease	3.28321e-215	0.292208	32115185	0	rs3134951	0.00725534	malabsorption/coeliac disease	1.05785e-303	257	7826	1656	420961	32115185	0	rs3134951	0.00725534	1
chr6:32233886-32294992	0.003903	malabsorption/coeliac disease	8.18105e-181	0.261273	32285362	0	rs116667074	0.0121666	ankylosing spondylitis	1.6312e-12	103	17895	1153	411549	32247045	1.39169e-28	rs145568234	0.00511808	1
chr6:32265528-32307532	0.00494484	malabsorption/coeliac disease	1.88979e-177	0.26003	32285362	0	rs116667074	0.0121666	hyperthyroidism/thyrotoxicosis	1.19278e-13	104	6328	3317	420951	32280591	5.90311e-109	rs9268208	0.00710264	1
chr6:32410215-32554129	0.0127356	multiple sclerosis	4.35701e-45	0.192418	32432969	1.04841e-107	rs9268925	-0.00458361	multiple sclerosis	8.35421e-55	119	8480	1470	420631	32432969	1.04841e-107	rs9268925	-0.00458361	0.9999
chr6:32412114-32565979	0.0129021	malabsorption/coeliac disease	4.86415e-234	0.288426	32412566	0	rs1131541	0.00827271	asthma	8.20919e-18	3026	19282	47612	360780	32429303	7.15453e-69	rs9268848	0.0137972	1
chr6:32412539-32573760	0.0129299	rheumatoid arthritis	8.1475e-122	0.208336	32561935	6.96378e-124	rs188575117	0.00824246	polymyalgia rheumatica	8.38693e-15	78	14277	925	415420	32560483	2.14043e-31	rs34212923	0.00228179	0.9871
chr6:32412539-32573760	0.0129299	rheumatoid arthritis	8.1475e-122	0.208336	32561935	6.96378e-124	rs188575117	0.00824246	polymyalgia rheumatica	8.38693e-15	78	14277	925	415420	32560483	2.14043e-31	rs34212923	0.00228179	0.9871
chr6:32453238-32603634	0.00751076	malabsorption/coeliac disease	1.05322e-237	0.318471	32583938	0	rs9271352	0.00773945	psoriasis	3.69131e-54	265	8584	4938	416913	32512293	2.60967e-264	rs116378640	0.0237156	1
chr6:32564985-32629755	0.00540842	malabsorption/coeliac disease	3.40814e-259	0.315214	32583938	0	rs9271352	0.00773945	diabetes	6.67285e-14	241	3418	17507	409534	32626272	9.88215e-38	rs9273363	0.00659667	1
chr6:32579003-32637724	0.00537814	malabsorption/coeliac disease	1.86107e-249	0.309824	32583938	0	rs9271352	0.00773945	type 1 diabetes	1.18738e-29	40	8476	362	421822	32627480	3.91573e-64	rs1064173	0.00138884	1
chr6:32626311-32681355	0.00115177	malabsorption/coeliac disease	4.10192e-230	0.29362	32679326	0	rs9275576	0.011764	hypothyroidism/myxoedema	4.76404e-36	555	17587	21230	391328	32636376	2.83451e-111	rs2856698	0.0124102	1
chr6:32634264-32682862	0.0992482	multiple sclerosis	8.87846e-24	0.13133	32648500	5.64152e-94	rs3129781	-0.00429829	ulcerative colitis	2.17818e-15	15	411	2370	427904	32676309	1.07771e-22	rs144614916	0.00553711	0.0218
chr6:32700083-32740856	0.0494966	malabsorption/coeliac disease	6.37197e-228	0.268977	32734304	1.48669e-315	rs9276601	0.00790219	malabsorption/coeliac disease	0	226	5407	1687	423380	32734304	1.48669e-315	rs9276601	0.00790219	1
chr6:32712009-32753313	0.0494724	malabsorption/coeliac disease	5.87931e-209	0.259585	32747502	0	rs4947258	0.011861	non-infective hepatitis	3.80402e-11	22	5387	436	424855	32734304	0.010818	rs9276601	0.000259637	1
chr6:32809349-32862682	0.013645	malabsorption/coeliac disease	5.89801e-117	0.265671	32813768	0	rs116827595	0.0119501	hyperthyroidism/thyrotoxicosis	1.04655e-24	188	11294	3233	415985	32844103	4.6818e-80	rs115591082	0.00651699	1
chr6:33072522-33115762	0.00870817	psoriatic arthropathy	8.5427e-12	0.121699	33094113	4.76084e-10	rs17221401	0.00100878	psoriatic arthropathy	1.2898e-13	26	3291	829	426554	33094113	4.76084e-10	rs17221401	0.00100878	1
chr6:33244320-33384473	0.0539418	malabsorption/coeliac disease	4.20256e-40	0.146598	33295977	2.24721e-168	rs35514703	0.0130315	malabsorption/coeliac disease	2.6993e-47	75	3616	1838	425171	33295977	2.24721e-168	rs35514703	0.0130315	1
chr6:34607958-35163974	0.0348891	prostate problem (not cancer)	2.83536e-08	0.0824798	34877041	0.0009809	rs76117834	0.00200741	prostate problem (not cancer)	2.43496e-11	10	810	755	429125	34877041	0.0009809	rs76117834	0.00200741	0.0291
chr7:34463595-34925661	0.229001	diverticular disease/diverticulitis	1.34825e-08	0.0317533	34691491	0.0086365	rs191492903	0.00660182	diverticular disease/diverticulitis	7.40031e-13	10	98	5246	425346	34691491	0.0086365	rs191492903	0.00660182	1
chr9:125367694-125752156	0.331445	benign breast lump	5.92016e-06	0.0594699	125696694	6.08553e-07	rs147925374	0.00502893	benign breast lump	4.12284e-11	12	563	1529	428596	125696694	6.08553e-07	rs147925374	0.00502893	1
chr9:23176910-23564704	0.659397	appendicitis	1.05247e-09	0.0397151	23265109	0.000630232	rs553142281	0.00868692	appendicitis	1.61535e-13	11	160	3771	426758	23265109	0.000630232	rs553142281	0.00868692	1
chr9:96214928-96685308	0.50797	stroke	2.78671e-10	0.0328646	96287934	1.01223e-06	rs775159674	0.0189629	stroke	5.06229e-12	10	91	5948	424651	96287934	1.01223e-06	rs775159674	0.0189629	0.0026

## Sheet: Sheet2
chr1:151515188-151902494
chr1:151940401-152280032
chr1:152493154-152964479
chr1:169075589-169528830
chr10:5735817-6010864
chr10:70390901-70808484
chr10:8148842-8420018
chr11:34791897-35181992
chr11:8335439-8710244
chr12:111910219-112874179
chr12:41382328-42027870
chr12:76520207-77060731
chr13:103385064-103580421
chr13:36502690-37025341
chr13:39396590-39787406
chr15:76395670-77197745
chr16:12156507-12486383
chr17:78925649-79174221
chr18:45028460-45484821
chr18:77574977-77933024
chr19:19334580-19765499
chr19:42306326-42894481
chr2:148272869-148915940
chr2:152677308-153354994
chr2:206822425-207365028
chr2:242116367-242463904
chr2:38902624-39377823
chr2:72313631-73155980
chr2:96017141-96963715
chr20:18043285-18433335
chr20:25264772-25920544
chr21:44145135-44424444
chr4:105810813-106318456
chr4:187588477-187830504
chr4:320771-691067
chr4:3263226-3503368
chr5:131824486-132311584
chr6:25414023-25812069
chr6:25969631-26108168
chr6:25981648-26117220
chr6:25988167-26122453
chr6:26031868-26149000
chr6:26380478-26467182
chr6:26700560-27201262
chr6:26700560-27201262
chr6:27036482-27277665
chr6:28085173-28177588
chr6:28349926-28483150
chr6:28371346-28508449
chr6:28510978-28724852
chr6:28956751-29086829
chr6:29081161-29257967
chr6:29356331-29408554
chr6:29589666-29664452
chr6:30025984-30079307
chr6:30036083-30093137
chr6:30384317-30515193
chr6:30647005-30690635
chr6:30671726-30711026
chr6:30672433-30711357
chr6:30764081-30805921
chr6:30935290-30983683
chr6:31017334-31060162
chr6:31125823-31170947
chr6:31251937-31261276
chr6:31254263-31263216
chr6:31262169-31298240
chr6:31367882-31407331
chr6:31379990-31413000
chr6:31431031-31464050
chr6:31555392-31605199
chr6:31560910-31613739
chr6:31710968-31794592
