# Supplementary material for: Discovery of runs-of-homozygosity diplotype clusters and their associations with diseases in UK Biobank
Source: eLife. 2024 Jun 21;13:e81698. doi: 10.7554/eLife.81698 (PMC11249732; doi:10.7554/eLife.81698)
Supplement: Supplementary file 5. [file elife-81698-supp5.xlsx]

## Sheet: S2
ID	Position	S1	S2	S3	S4	S5	S6	S7	S8	S9	S10	S11	S12	S13	S14	S15	S16	S17	S18	S19	S20	S21	S22	S23	S24	S25	S26	S27	S28	S29	S30	S31	S32	S33	S34	S35	S36	S37	S38	S39	S40	S41	S42	S43	S44	S45	S46	S47	S48
1	chr6:31431031-31464050	Affx-89025493:CC	rs77803816:GG	rs11557308:CC	rs78121360:GG	rs17206855:TT	rs2255221:GG	rs2255223:GG	rs2395029:TT	rs2395030:GG	rs78490730:AA	rs2284178:CT	rs17206904:TT	rs77424484:TT	rs11757571:CC	rs11757602:GG	rs11759988:TT	rs74290508:GG	rs74290509:GG	rs73728585:GG	rs3128987:TT	rs3094013:GG	rs62395309:AA	rs3131618:AA	rs78551378:GG	rs35163515:AA	rs2516518:GG	rs2516517:GG	rs9366784:CC	rs2523676:CC	rs79948024:GG	rs2859448:CC	rs2596454:AA	rs114419903:TT	rs77523206:AA	rs2244579:GG	rs4713467:CC	rs2395031:GG	rs9404989:GG	rs2244839:GG	rs7758090:CC	rs2844505:CC	rs9267139:GG	rs2523663:GG	rs1055569:CC	rs2516440:GG	rs3828886:TT	rs3828890:CC	rs4413654:GG
2	chr6:25969631-26108168	rs76757832:CC	rs1436310:CC	rs150462702:AA	rs13196552:AA	rs12192649:AA	rs199758:GG	rs115913330:CC	rs6906460:TT	rs199757:AA	rs13212534:GG	rs143607088:CC	rs1130000:GG	rs75463055:AA	rs2051538:GG	rs114124677:GG	rs2013063:TT	rs12216125:TT	rs12110735:CC	rs9393681:CC	rs10484432:AA	rs9467658:GG	rs11759668:AA	rs2237231:CC	rs34998486:GG	rs16891235:TT	rs34541321:GG	rs417751:GG	rs138096874:TT	rs143364138:CC	rs75397441:CC	rs9379818:TT	rs3752420:AA	rs114259939:GG	rs3752419:AA	rs10484433:CC	rs10484434:GG	rs10484435:TT	rs2213284:AA	rs2230655:AA	rs147664123:GG	rs3830054:GG	rs1540275:CC	rs11751732:GG	rs11755492:TT	rs7756117:AA	rs13220395:GG	rs8384:CC	rs12111009:CC
3	chr6:32564985-32629755	rs35372932:CC	rs28366353:AA	rs112333652:GG	rs28383172:AA	rs9270908:GG	rs146733600:CC	rs2647073:AA	rs9270986:CC	rs615672:GG	rs147947406:TT	rs617058:GG	rs2858867:AA	rs3021304:CC	rs9271117:CC	rs660895:AA	rs532965:TT	rs674313:CC	rs502771:TT	rs502055:TT	rs9271209:GG	rs4530903:TT	rs521539:GG	rs642093:GG	rs5004277:CC	rs3104413:CC	rs113979555:AA	rs77015620:AA	rs114609017:GG	rs28383254:AA	rs28383271:CC	rs9271367:GG	rs9271414:CC	rs9271425:AA	rs9271489:CC	rs34645399:AA	rs114493852:GG	rs80192719:GG	rs9271541:AA	rs17533090:TT	rs17533167:CC	rs9271588:CC	rs34224986:TT	rs34411532:AA	rs9271683:TT	rs9271709:GG	rs9271720:AA	rs9271771:CC	rs9271824:GG
4	chr6:32410215-32554129	rs3129885:TT	rs3129886:TT	rs3129887:GG	rs9268659:TT	rs3135391:AA	rs8084:AA	rs138462914:GG	rs2239806:CC	rs13218331:AA	rs2239805:TT	rs2239804:TT	rs7192:TT	rs16822632:GG	rs3129888:GG	rs2239803:CC	rs2239802:CC	rs115317719:GG	rs71565323:CC	rs3177928:GG	rs7194:GG	rs7195:AA	rs3135388:AA	rs2213586:AA	rs2395182:GG	rs2227139:GG	rs3129889:GG	rs3763326:TT	rs16822660:TT	rs3763327:GG	rs11752571:CC	rs3129890:TT	rs3129891:GG	rs13209234:GG	rs28895095:GG	rs28895107:TT	rs28895198:TT	rs28732226:TT	rs13207140:GG	rs28732233:CC	rs28732234:GG	rs9268831:CC	rs9268832:TT	rs28732235:GG	rs17209126:AA	rs9268833:CC	rs9268835:GG	rs6923504:GG	rs6903608:CC
5	chr6:31710968-31794592	rs707915:TT	rs2293861:CC	rs28381355:GG	rs11964779:AA	rs3749953:AA	rs3828922:CC	rs3130484:TT	rs116043458:AA	rs1150793:AA	rs2299851:GG	rs3131379:GG	rs9296001:CC	rs11754464:CC	rs3117574:GG	rs3131378:AA	rs28399976:CC	rs28399977:CC	rs3117575:TT	rs707939:AA	rs3117577:AA	rs9461718:AA	rs61748589:AA	rs2075801:GG	rs707938:AA	rs148601889:GG	rs1802127:CC	rs17201144:AA	rs17201151:CC	rs707937:CC	rs28399989:CC	rs6905572:CC	rs28399992:TT	rs28399993:GG	rs9461719:CC	rs28399994:GG	rs11967206:CC	rs28399997:GG	rs707936:GG	rs28399999:CC	rs3115671:GG	rs28400004:CC	rs707934:CC	rs62395823:GG	rs114263207:GG	rs11966331:CC	rs115313300:GG	rs142871734:CC	rs115526889:CC
6	chr6:34607958-35163974	rs17644393:GG	rs79003345:CC	rs3800461:GG	rs2814992:AA	rs2814993:GG	rs7739387:TT	rs35987776:CC	rs116072038:TT	rs78147341:TT	rs76419500:GG	rs114847264:AA	rs6932930:AA	rs6938239:AA	rs35369977:AA	rs2764206:GG	rs34427075:CC	rs77262732:GG	rs7741437:CC	rs35143960:AA	rs117637471:GG	rs72894003:CC	rs115566179:GG	rs79165228:AA	rs9462026:CC	rs35356162:GG	rs4259246:CC	rs72894042:GG	rs114752273:GG	rs16894945:AA	rs11755393:AA	rs16894959:TT	Affx-52368744:CCTCCT	rs45458098:CC	rs61732794:CC	rs61732793:GG	rs9469913:AA	rs201415785:AA	rs13205210:TT	rs3734264:GG	rs35173014:CC	rs72894062:AA	rs115340686:TT	rs147415559:AA	rs34672415:GG	rs80059263:GG	rs3822923:CC	rs4646949:TT	rs15922:GG
7	chr6:31254263-31263216	rs7754443:AA	rs55691061:CC	rs9380236:AA	rs73728786:AA	rs73728788:TT	rs116455298:AA	rs9468920:AA	rs115309598:AA	rs73728791:TT	rs9468922:AA	rs114875410:TT	rs2853929:CC	rs2524051:AA	rs2524049:CC	rs17198734:CC	rs17198741:GG	rs55994500:GG	rs17192386:GG	rs75009018:AA	rs17192400:AA	rs17192407:AA	rs17198748:GG	rs115654548:TT	rs9366776:GG	rs16899160:GG	rs17192428:CC	rs17192435:CC	rs2524044:TT	rs115595761:TT	rs116311956:CC	rs114949074:GG	rs2524043:AA	rs73728794:AA	rs115482903:GG	rs114526113:TT	rs80253433:GG	rs73728796:GG	rs116491762:TT	rs74808880:GG	rs115466387:CC	rs114596856:CC	rs116095150:TT	rs115313279:GG	rs114047638:AA	rs77546204:GG	rs116422780:TT	rs115835283:GG	rs115867506:CC
8	chr6:33072522-33115762	rs61742525:GG	rs9296079:GG	rs3130210:GG	rs2064476:AA	rs116143495:GG	rs2064474:GG	rs17214852:AG	rs3117234:AA	rs3128927:CC	rs3130212:GG	rs3130214:GG	rs3117231:AA	rs3130215:GG	rs6911848:CC	rs910320:CC	rs3117230:AA	rs3128930:CC	rs9296080:CC	rs9296081:CC	rs11965763:TT	rs9378179:GG	rs3130216:AA	rs6924545:CC	rs9380343:CC	rs12174662:GG	rs6937034:AA	rs6937061:AA	rs11755617:CC	rs9380345:CC	rs9348906:TT	rs9366814:TT	rs11751659:GG	rs7744381:CC	rs9348907:CC	rs9277628:AA	rs733208:GG	rs9277637:CC	rs1810472:TT	rs2395349:GG	rs9277641:GG	rs9277642:TT	rs9277643:CC	rs9277661:TT	rs3129294:AA	rs9277665:GG	rs3117039:CC	rs4711314:GG	rs1883414:GG
9	chr6:32412539-32573760	rs7195:GG	rs3135388:GG	rs2213586:GG	rs2395182:TT	rs2227139:AA	rs3129889:AA	rs3763326:TT	rs16822660:TT	rs3763327:CC	rs11752571:CC	rs3129890:TT	rs3129891:GG	rs13209234:GG	rs28895095:GG	rs28895107:TT	rs28895198:TT	rs28732226:TT	rs13207140:GG	rs28732233:CC	rs28732234:GG	rs9268831:TT	rs9268832:CC	rs28732235:GG	rs17209126:AA	rs9268833:TT	rs9268835:AA	rs6923504:CC	rs6903608:TT	rs9268839:GG	rs36056234:GG	Affx-28475675:GG	rs9268853:CC	rs9268861:CC	rs9268862:AA	rs4434496:CC	rs28732236:GG	rs9268877:GG	rs41291798:CC	rs9268885:CC	rs9268923:TT	rs2395185:TT	rs9268969:TT	rs9268973:TT	rs9268977:TT	rs2157338:CC	rs1974461:CC	rs5026743:TT	rs9357149:CC
10	chr1:169075589-169528830	rs115435245:GG	rs1200131:GG	rs1200132:CC	rs1358714:GG	rs1200136:TT	rs1200139:TT	rs75171076:CC	rs67777478:CC	rs1040503:AA	rs3820048:CC	rs3766033:GG	rs1040502:CC	rs10919064:CC	rs146260113:CC	rs75112989:GG	rs10919071:AA	rs12079745:GG	rs74365745:GG	rs77792912:CC	rs112935834:GG	rs10919079:TT	rs932394:GG	rs3766059:TT	rs17349460:AA	rs78201132:AA	rs4656662:TT	rs78598019:CC	rs6675220:GG	rs1208377:AA	rs77271624:CC	rs12093387:AA	rs12751407:TT	rs3766090:GG	rs115023192:TT	rs147020111:TT	rs929132:AA	rs35003708:GG	rs72702154:TT	rs72702156:AA	rs12061080:GG	rs17349586:TT	Affx-35417132:CC	rs1028180:AA	Affx-52314813:TT	rs78043796:GG	rs148310730:GG	rs113548186:GG	rs1112839:CC
11	chr1:151515188-151902494	rs12121608:TT	rs76989031:AA	rs147244422:GG	rs77467763:GG	rs11204849:GG	rs138156504:GG	rs6701819:TT	rs41310883:CC	rs115774562:GG	rs80320753:GG	rs10494267:TT	rs200295384:CC	rs74532357:CC	rs1970568:AA	rs1196360:AA	rs77519409:GG	rs114502917:CC	rs74660944:CC	rs17641132:CC	rs12754706:GG	rs73000034:CC	rs77919400:AA	rs56211076:CC	rs1196462:GG	rs77326332:CC	rs116602689:GG	rs61762678:GG	rs150091333:TT	rs1607933:GG	rs138859961:GG	rs72692752:AA	rs141982710:GG	rs3790512:GG	rs7537265:GG	rs12132987:AA	rs41263704:AA	rs115385042:GG	rs41263710:AA	rs2298294:AA	rs80113901:AA	rs41263712:AA	rs75414908:GG	rs6587617:GG	rs142753752:GG	rs8480:TT	rs142733950:TT	rs138606324:CC	rs146246134:CC
12	chr1:151940401-152280032	rs1552605:GG	rs142923959:GG	rs3838479:TT	rs11204922:CC	rs75055982:GG	rs114410520:GG	rs1490188:TT	rs17645567:CC	rs72696912:GG	rs115288876:GG	rs116828313:GG	rs2999555:TT	rs3007679:TT	rs3007684:GG	rs3124314:TT	rs77496282:CC	rs7549007:TT	rs61749316:GG	rs142056537:GG	rs17646946:GG	rs1039088:GG	rs72696932:GG	rs9050:CC	rs1131473:CC	rs1131471:TT	rs140720320:CC	rs199741439:CC	rs201025224:GG	Affx-52111192:CC	rs2496253:GG	rs188935941:CC	rs199577810:AA	rs3134814:CC	rs1496041:CC	rs36010924:AA	rs11588437:AA	rs113247985:CC	rs75957773:TT	rs72696940:GG	rs78544048:TT	rs185631749:CC	rs200282084:AA	rs79144663:GG	rs80239600:GG	rs6667458:AA	rs114394160:TT	rs78157148:AA	rs6696576:GG
13	chr1:152493154-152964479	rs499697:AA	rs11801493:CC	rs1001149:CC	rs6662656:GG	rs77893851:CC	rs116598467:AA	rs34364956:GG	rs78932044:CC	rs79933369:TT	rs6674451:TT	rs4240888:GG	rs78984538:TT	rs4845791:AA	rs10888501:GG	rs141660085:GG	rs72700982:TT	rs12046030:CC	rs16834215:CC	rs4085613:GG	rs4112788:GG	rs512208:AA	rs1853806:GG	rs75796616:CC	rs77215678:GG	rs78917988:TT	rs11205060:CC	rs56060550:CC	rs41267636:CC	rs41268444:CC	rs12123167:CC	rs77313071:CC	rs41310873:AA	rs7533473:GG	rs3904413:CC	rs80271068:GG	rs58733562:GG	rs147765240:CC	rs41268472:AA	rs1332500:CC	rs873775:CC	rs41268474:GG	rs6657482:GG	rs10888511:GG	rs77963439:GG	rs12091871:AA	rs17612167:AA	rs944683:TT	rs141893273:GG
14	chr12:111910219-112874179	rs10774625:AA	rs117666960:TT	rs17805591:GG	rs1029388:TT	rs4041274:TT	rs61944384:GG	rs16941541:GG	rs657197:CC	rs7969300:CC	rs80091843:TT	rs653178:CC	rs117800259:AA	rs74428042:AA	rs11065987:GG	rs73203613:TT	rs6416335:CC	rs17685230:GG	rs17628828:CC	rs75694333:GG	rs3742001:CC	rs2051792:CC	rs666951:CC	rs627308:CC	rs4766897:TT	rs138790472:AA	rs77034308:CC	rs34245489:CC	rs149500655:GG	rs75655687:GG	rs118018677:GG	rs6490294:CC	rs34229224:GG	rs79648590:GG	rs886205:AA	rs2238151:TT	rs75852434:CC	rs13306164:CC	rs4646777:GG	rs671:GG	rs16941669:TT	rs10161111:GG	rs12370770:CC	rs76241901:CC	rs4767068:AA	rs199721843:AA	rs34843470:GG	rs16941724:TT	rs7974772:CC
[truncated: 60 more columns]
