# Supplementary figures and images for: Discovery of runs-of-homozygosity diplotype clusters and their associations with diseases in UK Biobank
Source: eLife journal article supplement (doi:10.7554/elife.81698), 2024-06-21

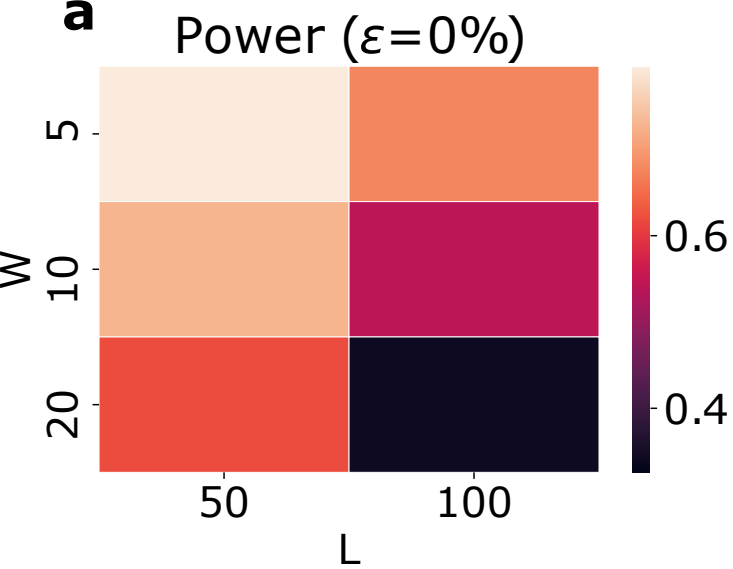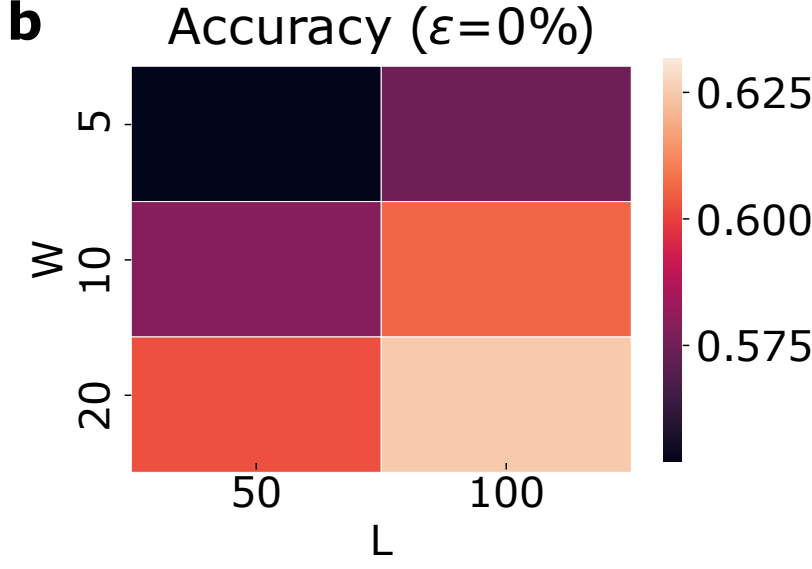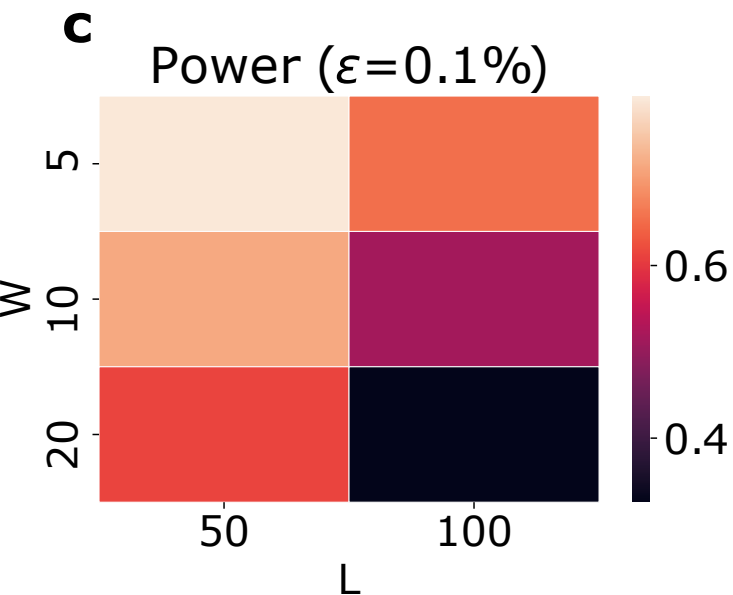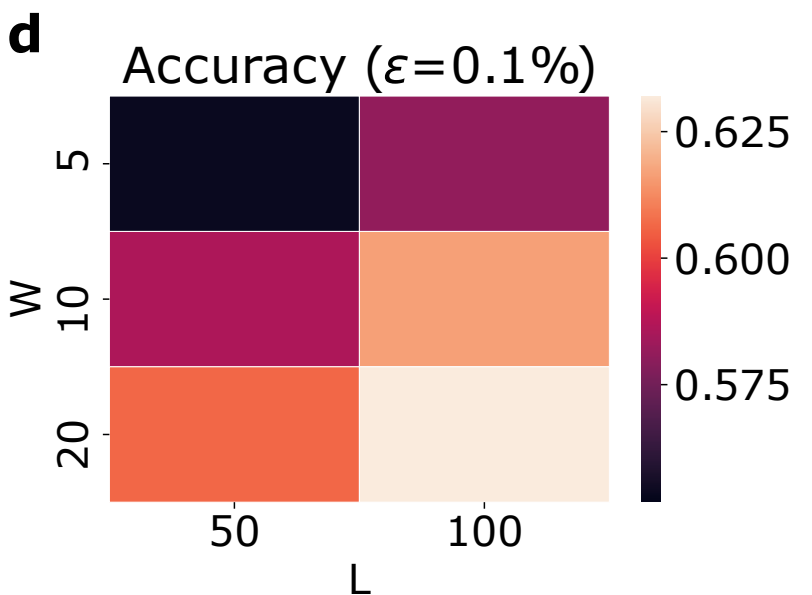

Supplement: supp [file elife-81698-supp-v1.zip]

#Individuals

150000

100000

50000

0

1

2

3

4

5

6

7

8

9

10

11

12

13

14

15

16

17

18

19

20

21

22

Chromosome

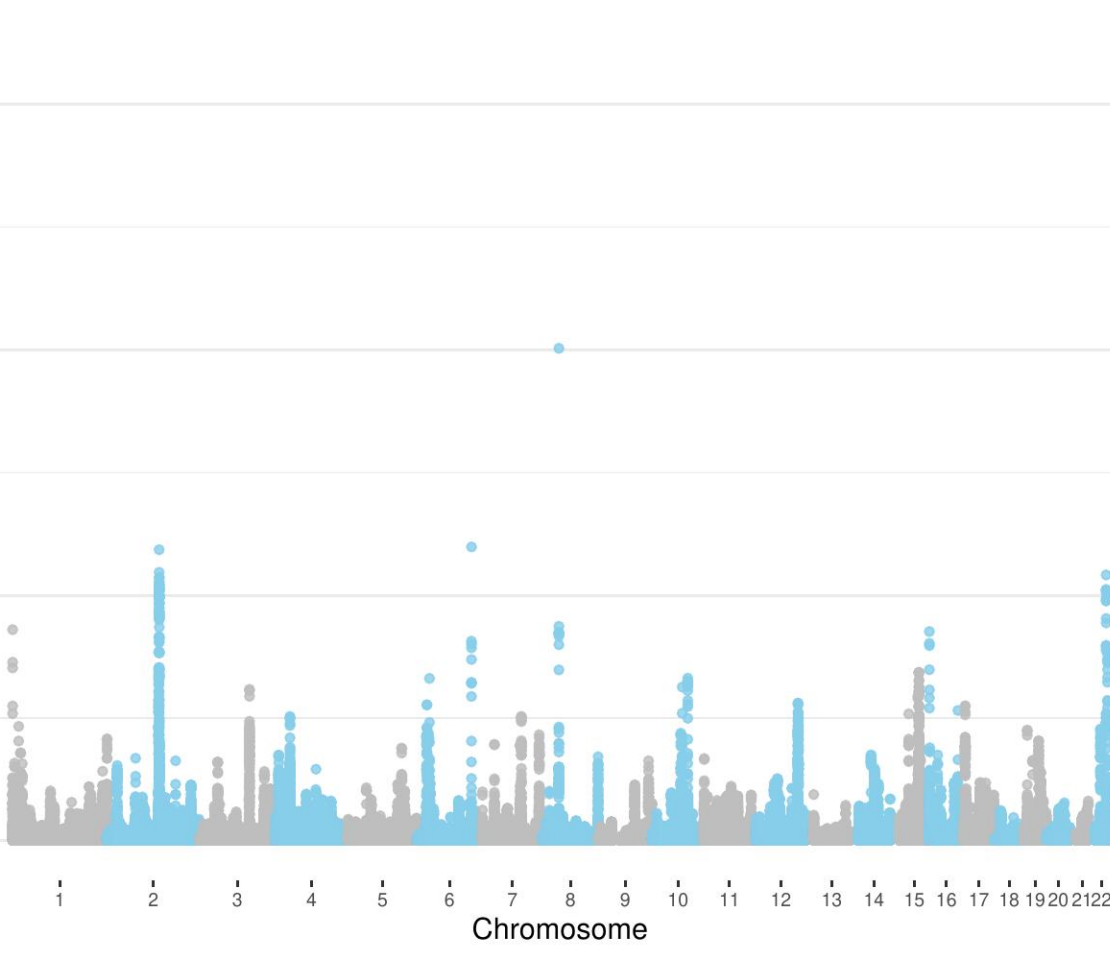

Supplement: supp [file elife-81698-supp-v1.zip]

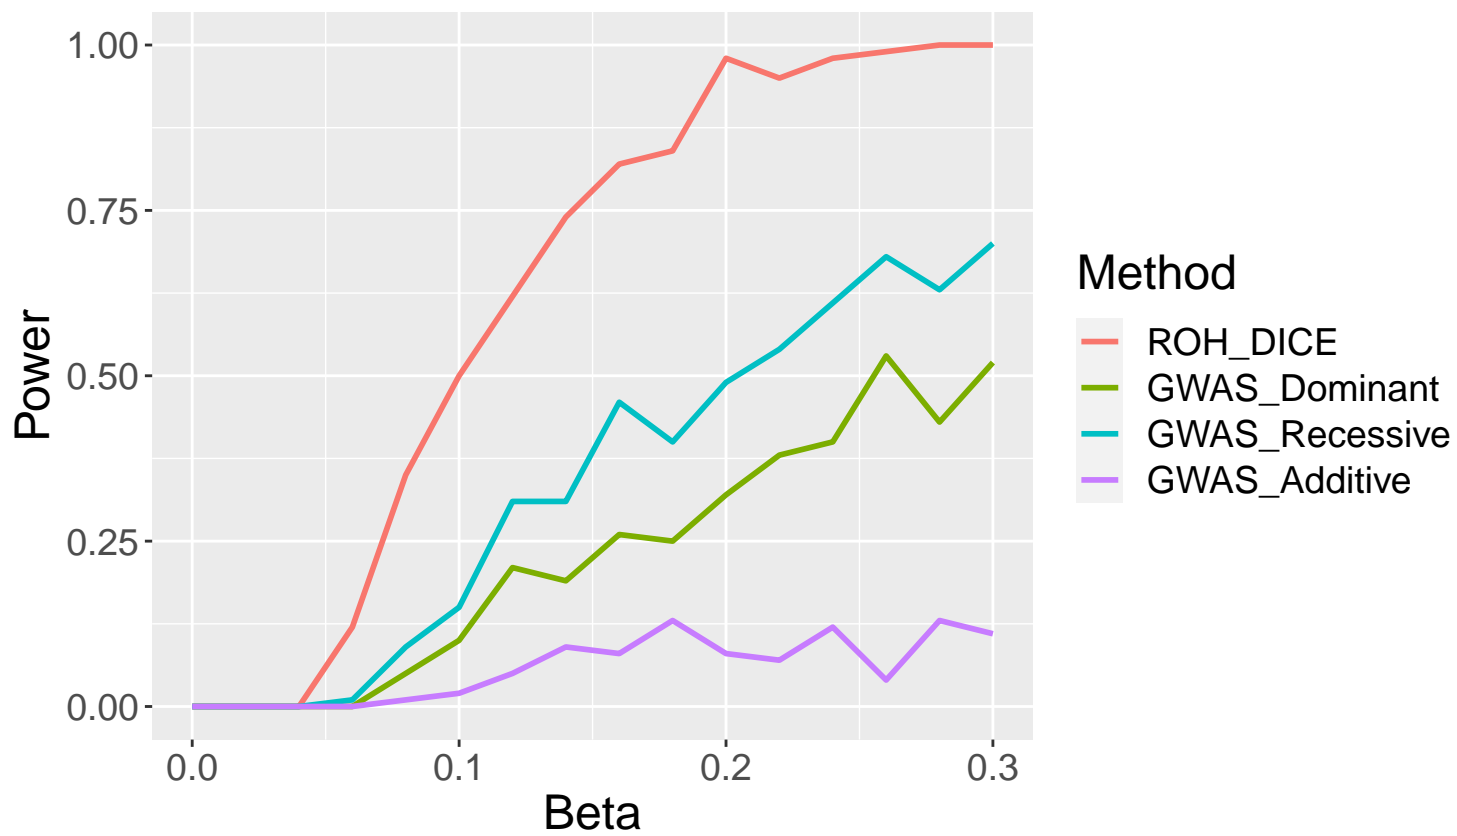

Supplement: supp [file elife-81698-supp-v1.zip]

# Power

target:  $L=100$ ,  $W=20$

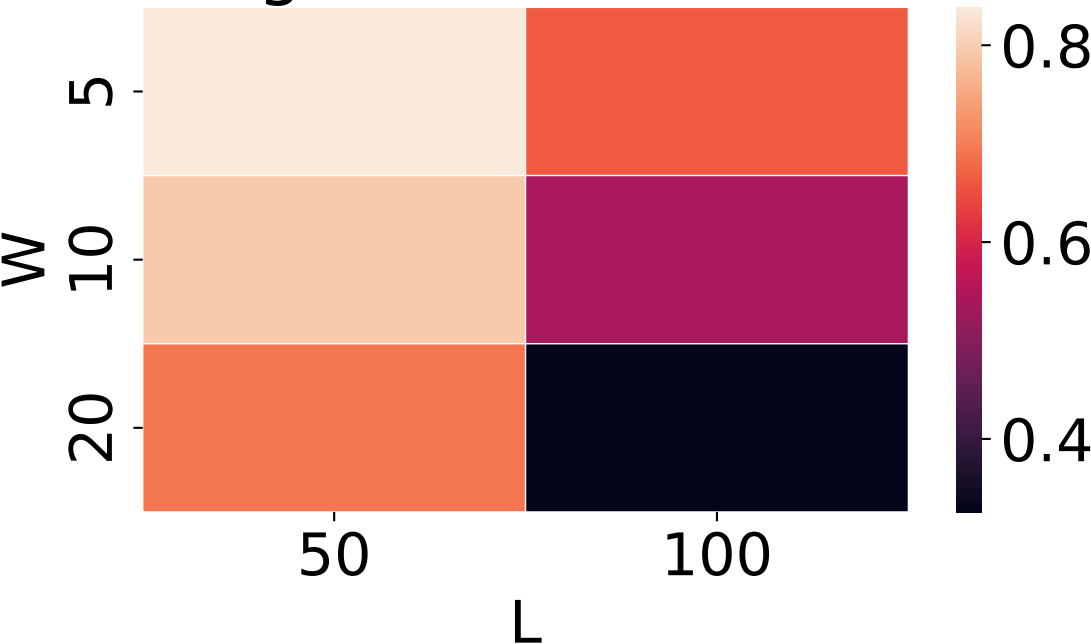

Supplement: supp [file elife-81698-supp-v1.zip]

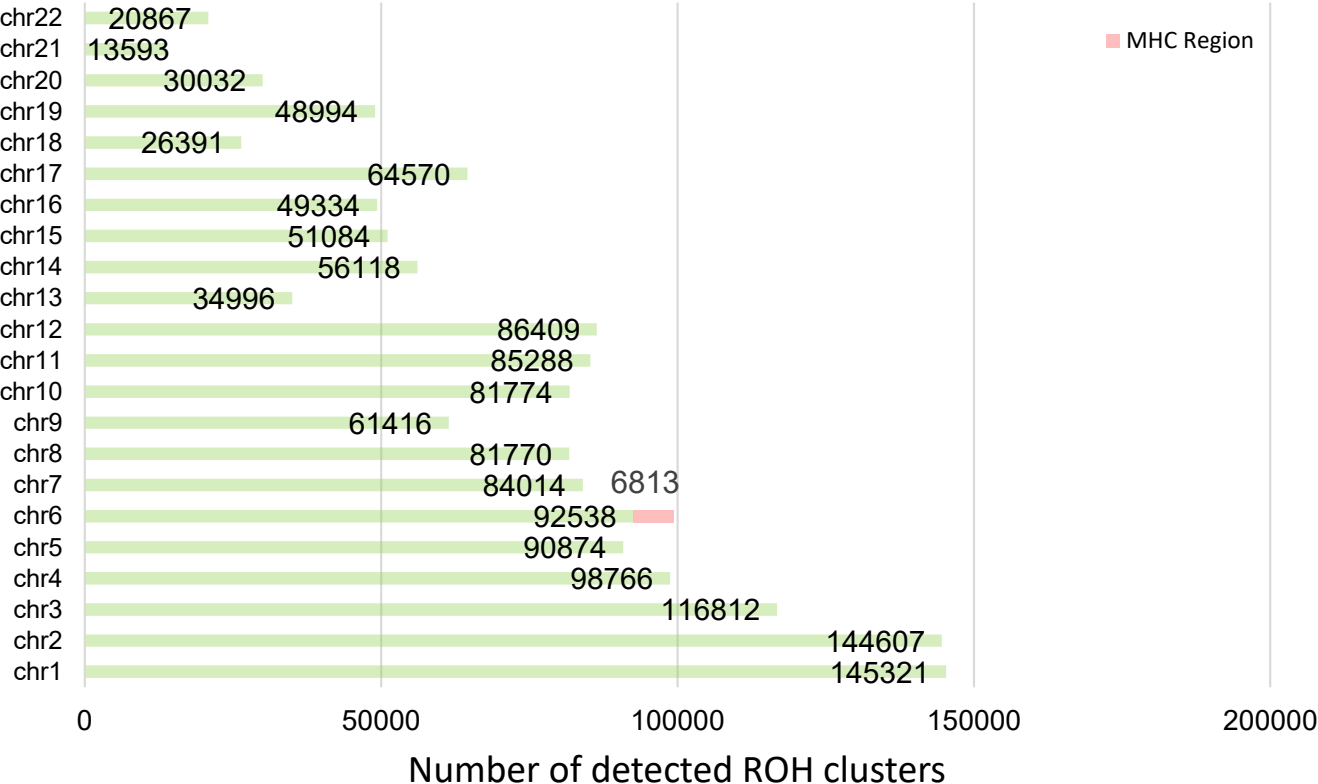

Supplement: supp [file elife-81698-supp-v1.zip]
